# Supplementary material for: Association of Lower Plasma Homoarginine Concentrations with Greater Risk of All-Cause Mortality in the Community: The Framingham Offspring Study
Source: MDPI journal article supplement (doi:10.3390/jcm9062016), 2020-06-26
Supplement: s1 [file s1]

**Supplementary Table 1.** Association of plasma homoarginine with risk of all-cause mortality further adjusting for eGFR, CRP, BNP, GDF15 or troponin I.

| Variable *   | Fully Adjusted<br>HR 95 % CI ** | P value |
|--------------|---------------------------------|---------|
| Homoarginine | 0.83 (0.74–0.93)                | 0.002   |
| +eGFR        | 0.83 (0.74–0.94)                | 0.002   |
| +CRP         | 0.78 (0.67–0.91)                | 0.002   |
| +BNP         | 0.84 (0.75–0.95)                | 0.003   |
| +GDF15       | 0.87 (0.78–0.97)                | 0.013   |
| +Troponin I  | 0.83 (0.74–0.93)                | 0.002   |

\* We adjusted models for age, sex, systolic blood pressure, body mass index, current smoking, use of anti-hypertensive medications, diabetes, total cholesterol/HDL cholesterol ratio, prevalent CVD, ADMA, homoarginine and additionally for eGFR, CRP, BNP, GDF15 or troponin I, respectively. Biomarkers were standardized to one standard deviation increase. BNP, b-type natriuretic peptide; CRP, C-reactive protein; eGFR, glomerular filtration rate; GDF15, growth/differentiation factor 15. \*\* HRs are per 1-SD increase in homoarginine.
